# Supplementary material
Source: publisher site journal article supplement (http://kjim.org/upload/media/kjim-2022-401-Supplementary-Fig-5.pdf)
Supplement: Supplementary file 1 [file kjim-2022-401-Supplementary-Fig-5.pdf]

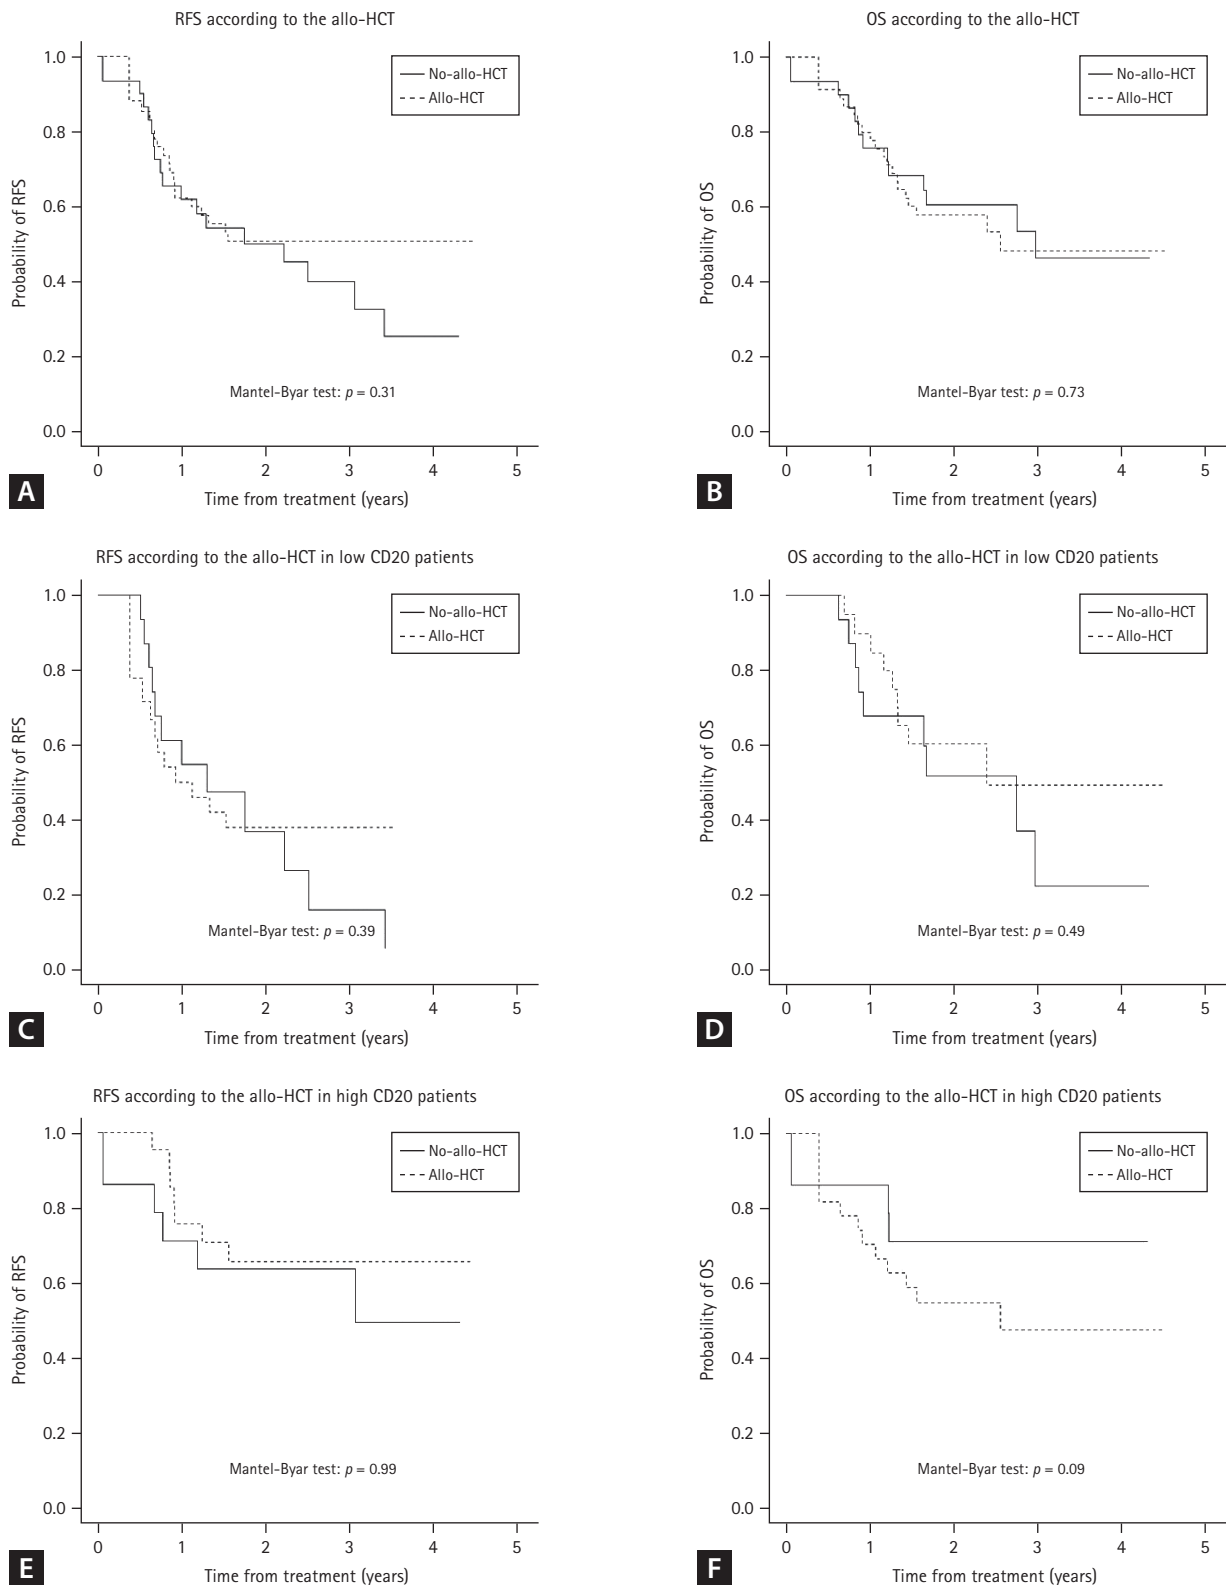

**Supplementary Figure 5.** Comparison of survival outcomes according to allo-HCT and CD20 expression level. There was no significant difference in the long-term survival of patients receiving allo-HCT or not, regardless of CD20 expression. (A) Overall RFS of patients. (B) Overall OS of patients. (C) RFS of low CD20 patients. (D) OS of low CD20 patients. (E) RFS of high CD20 patients. (F) OS of high CD20 patients. RFS, relapse-free survival; allo-HCT, allogeneic hematopoietic cell transplantation; OS, overall survival.
